# Supplementary material for: Simultaneous Bayesian Clustering and Model Selection with Mixture of Robust Factor Analyzers
Source: MDPI journal article supplement (doi:10.3390/math12071091), 2024-04-04
Supplement: s1 [file s1]

# Supplementary Materials: Simultaneous Bayesian Clustering and Model Selection with Mixture of Robust Factor Analyzers

Shan Feng <sup>1,2,\*</sup> , Wenxian Xie <sup>1</sup> and Yufeng Nie <sup>1,\*</sup>

## 1. Deriving the auxiliary posteriors of the latent variables

(i)  $q(u_{nl}|\phi_{nl}, z_n)$ : The evidence lower bound associated with the auxiliary posterior  $q(u_{nl}|\phi_{nl} = 1, z_n = k)$  can be read as

$$\mathcal{L} = \langle \log p(y_{nl}, u_{nl} | \mathbf{x}_{nk}, \mathbf{r}_{nk}, \phi_{nl} = 1, z_n = k) - \log q(u_{nl} | \phi_{nl} = 1, z_n = k) \rangle_q. \quad (1)$$

According to the KKT condition, and using the Lagrange multiplier [1], we obtain the  $q(u_{nl}|\phi_{nl} = 1, z_n = k)$  maximizing the lower bound as

$$\begin{aligned} q(u_{nl}|\phi_{nl} = 1, z_n = k) &\propto \exp [\langle \log p(y_{nl} | \mathbf{x}_{nk}, \mathbf{r}_{nk}, u_{nl}, \phi_{nl} = 1, z_n = k) \rangle + \langle \log p(u_{nl} | \phi_{nl} = 1, z_n = k) \rangle] \\ &\propto \exp \left[ \frac{1}{2} \log u_{nl} - \frac{1}{2} \langle \sigma_{kl} \rangle \langle (\tilde{y}_{nl}^k - \mu_{kl})^2 \rangle u_{nl} + \left( \frac{v_{kl}}{2} - 1 \right) \log u_{nl} - \frac{v_{kl}}{2} u_{nl} \right], \end{aligned} \quad (2)$$

which gives

$$q(u_{nl}|\phi_{nl} = 1, z_n = k) = \mathcal{G}(u_{nl} | \hat{a}_{kl}, \hat{b}_{nl}^k), \quad (3)$$

as shown in the paper.

The evidence lower bound associated with  $q(u_{nl}|\phi_{nl} = 0)$  can be read as

$$\mathcal{L} = \left\langle \sum_k \delta_{z_n, k} \log p(y_{nl}, u_{nl} | \mathbf{x}_{nk}, \mathbf{r}_{nk}, \phi_{nl} = 0, z_n = k) - \log q(u_{nl} | \phi_{nl} = 0) \right\rangle_q. \quad (4)$$

The posterior  $q(u_{nl}|\phi_{nl} = 0)$  maximizing the lower bound is given by

$$\begin{aligned} q(u_{nl}|\phi_{nl} = 0) &\propto \exp \left[ \sum_k \langle \delta_{z_n, k} \rangle \langle \log p(y_{nl} | \mathbf{x}_{nk}, \mathbf{r}_{nk}, u_{nl}, \phi_{nl} = 0, z_n = k) \rangle + \langle \log p(u_{nl} | \phi_{nl} = 0) \rangle \right] \\ &\propto \exp \left\{ \frac{1}{2} \sum_k \langle \delta_{z_n, k} \rangle \left[ \log u_{nl} - \langle \sigma_{0l} \rangle \langle (\tilde{y}_{nl}^k - \mu_{0l})^2 \rangle u_{nl} \right] + \left( \frac{v_{0l}}{2} - 1 \right) \log u_{nl} - \frac{v_{0l}}{2} u_{nl} \right\}, \end{aligned} \quad (5)$$

which gives

$$q(u_{nl}|\phi_{nl} = 0) = \mathcal{G}(u_{nl} | \hat{a}_{0l}, \hat{b}_{nl}^0), \quad (6)$$

as shown in the paper.

(ii)  $q(\phi_{nl})$ : The evidence lower bound associated with the auxiliary posterior  $q(\phi_{nl})$  is

$$\begin{aligned} \mathcal{L} &= \left\langle \phi_{nl} \left[ \sum_k \delta_{z_n, k} \log p(y_{nl}, u_{nl} | \mathbf{x}_{nk}, \mathbf{r}_{nk}, \phi_{nl} = 1, z_n = k) \right. \right. \\ &\quad \left. \left. - \sum_k \delta_{z_n, k} \log q(u_{nl} | \phi_{nl} = 1, z_n = k) + \log \beta_l - \log q(\phi_{nl} = 1) \right] \right. \\ &\quad \left. + (1 - \phi_{nl}) \left[ \sum_k \delta_{z_n, k} \log p(y_{nl}, u_{nl} | \mathbf{x}_{nk}, \mathbf{r}_{nk}, \phi_{nl} = 0, z_n = k) \right. \right. \\ &\quad \left. \left. - \log q(u_{nl} | \phi_{nl} = 0) + \log(1 - \beta_l) - \log q(\phi_{nl} = 0) \right] \right\rangle_q. \end{aligned} \quad (7)$$

Define

$$\begin{aligned}\bar{q}(\phi_{nl} = 1) &= \exp \left\{ \sum_k \langle \delta_{zn,k} \rangle \langle \log p(y_{nl} | \mathbf{x}_{nk}, \mathbf{r}_{nk}, u_{nl}, \phi_{nl} = 1, z_n = k) \right. \\ &\quad \left. + \log p(u_{nl} | \phi_{nl} = 1, z_n = k) - \log q(u_{nl} | \phi_{nl} = 1, z_n = k) \rangle + \langle \log \beta_l \rangle \right\}, \\ \bar{q}(\phi_{nl} = 0) &= \exp \left\{ \sum_k \langle \delta_{zn,k} \rangle \langle \log p(y_{nl} | \mathbf{x}_{nk}, \mathbf{r}_{nk}, u_{nl}, \phi_{nl} = 0, z_n = k) \rangle \right. \\ &\quad \left. + \langle \log p(u_{nl} | \phi_{nl} = 0) \rangle - \langle \log q(u_{nl} | \phi_{nl} = 0) \rangle + \langle \log(1 - \beta_l) \rangle \right\}. \quad (8)\end{aligned}$$

Then,  $q(\phi_{nl})$  can be obtained by

$$q(\phi_{nl} = 1) = \frac{\bar{q}(\phi_{nl} = 1)}{\bar{q}(\phi_{nl} = 1) + \bar{q}(\phi_{nl} = 0)}, \quad (9)$$

and  $q(\phi_{nl} = 0) = 1 - q(\phi_{nl} = 1)$ . Referring to the expectations calculated in Table A1 in the paper, we have

$$\begin{aligned}\bar{q}(\phi_{nl} = 1) &= \exp \left\{ \sum_k \langle \delta_{zn,k} \rangle \left[ \frac{1}{2} \langle \log \sigma_{kl} \rangle + \frac{v_{kl}}{2} \log \frac{v_{kl}}{2} - \log \Gamma\left(\frac{v_{kl}}{2}\right) \right. \right. \\ &\quad \left. \left. - \hat{a}_{kl} \log \hat{b}_{nl}^k + \log \Gamma(\hat{a}_{kl}) \right] + \langle \log \beta_l \rangle + \text{const.} \right\}, \\ \bar{q}(\phi_{nl} = 0) &= \exp \left[ \frac{1}{2} \langle \log \sigma_{0l} \rangle + \frac{v_{0l}}{2} \log \frac{v_{0l}}{2} - \log \Gamma\left(\frac{v_{0l}}{2}\right) \right. \\ &\quad \left. - \hat{a}_{0l} \log \hat{b}_{nl}^0 + \log \Gamma(\hat{a}_{0l}) + \langle \log(1 - \beta_l) \rangle + \text{const.} \right], \quad (10)\end{aligned}$$

as shown in the paper.

(iii)  $q(\mathbf{x}_{nk} | \mathbf{r}_{nk})$ : Maximizing the evidence lower bound associated with  $q(\mathbf{x}_{nk} | \mathbf{r}_{nk})$  gives

$$\begin{aligned}q(\mathbf{x}_{nk} | \mathbf{r}_{nk}) &\propto \exp \left[ \log \mathcal{N}(\mathbf{x}_{nk} | \mathbf{0}, \mathbf{I}_{p_k}) + \sum_l \langle \phi_{nl} \rangle \langle \log p(y_{nl} | \mathbf{x}_{nk}, \mathbf{r}_{nk}, u_{nl}, \phi_{nl} = 1, z_n = k) \rangle \right. \\ &\quad \left. + \sum_l \langle 1 - \phi_{nl} \rangle \langle \log p(y_{nl} | \mathbf{x}_{nk}, \mathbf{r}_{nk}, u_{nl}, \phi_{nl} = 0, z_n = k) \rangle \right] \\ &\propto \exp \left[ -\frac{1}{2} \mathbf{x}_{nk}^T \mathbf{x}_{nk} - \frac{1}{2} \sum_l \langle \phi_{nl} \rangle \langle \sigma_{kl} \rangle \langle u_{nl} \rangle_k^1 \langle (y_{nl} - \mathbf{w}_{kl}^T \mathbf{R}_{nk} \mathbf{x}_{nk} - \mu_{kl})^2 \rangle \right. \\ &\quad \left. - \frac{1}{2} \sum_l \langle 1 - \phi_{nl} \rangle \langle \sigma_{0l} \rangle \langle u_{nl} \rangle^0 \langle (y_{nl} - \mathbf{w}_{kl}^T \mathbf{R}_{nk} \mathbf{x}_{nk} - \mu_{0l})^2 \rangle \right]. \quad (11)\end{aligned}$$

The expectations are taken by fixing on  $\mathbf{x}_{nk}$  and conditioning on  $\mathbf{r}_{nk}$ . It can be obtained that

$$q(\mathbf{x}_{nk} | \mathbf{r}_{nk}) = \mathcal{N}(\mathbf{x}_{nk} | \hat{\mathbf{f}}_n^k(\mathbf{r}_{nk}), \hat{\mathbf{C}}_n^k(\mathbf{r}_{nk})), \quad (12)$$

as shown in the paper.

(iv)  $q(\mathbf{r}_{nk})$ : The evidence lower bound associated with  $q(\mathbf{r}_{nkj})$  is given by

$$\begin{aligned} \mathcal{L} = & \left\langle \log \mathcal{N}(\mathbf{x}_{nk} | \mathbf{0}, \mathbf{I}_{p_k}) + \sum_l \phi_{nl} \log p(y_{nl} | \mathbf{x}_{nk}, \mathbf{r}_{nk}, u_{nl}, \phi_{nl} = 1, z_n = k) \right. \\ & + \sum_l (1 - \phi_{nl}) \log p(y_{nl} | \mathbf{x}_{nk}, \mathbf{r}_{nk}, u_{nl}, \phi_{nl} = 0, z_n = k) - \log q(\mathbf{x}_{nk} | \mathbf{r}_{nk}) \\ & \left. + r_{nkj} [\log \rho_{kj} - \log q(r_{nkj} = 1)] + (1 - r_{nkj}) [\log(1 - \rho_{kj}) - \log q(r_{nkj} = 0)] \right\rangle_q. \quad (13) \end{aligned}$$

If we define

$$\begin{aligned} \bar{q}(r_{nkj} = c) = \exp & \left[ \langle \log \mathcal{N}(\mathbf{x}_{nk} | \mathbf{0}, \mathbf{I}_{p_k}) \rangle + \sum_l \langle \phi_{nl} \rangle \langle \log p(y_{nl} | \mathbf{x}_{nk}, \mathbf{r}_{nk}, u_{nl}, \phi_{nl} = 1, z_n = k) \rangle \right. \\ & + \sum_l \langle 1 - \phi_{nl} \rangle \langle \log p(y_{nl} | \mathbf{x}_{nk}, \mathbf{r}_{nk}, u_{nl}, \phi_{nl} = 0, z_n = k) \rangle \\ & \left. - \langle \log q(\mathbf{x}_{nk} | \mathbf{r}_{nk}) \rangle + c \langle \log \rho_{kj} \rangle + (1 - c) \langle \log(1 - \rho_{kj}) \rangle \right], \quad (14) \end{aligned}$$

where the expectations are taken by fixing on  $r_{nkj} = c$  ( $c \in \{0, 1\}$ ), then,  $q(r_{nkj})$  that maximizes the lower bound can be obtained as

$$q(r_{nkj} = 1) = \frac{\bar{q}(r_{nkj} = 1)}{\bar{q}(r_{nkj} = 1) + \bar{q}(r_{nkj} = 0)}, \quad (15)$$

and  $q(r_{nkj} = 0) = 1 - q(r_{nkj} = 1)$ . Mathematical manipulation gives

$$\begin{aligned} \bar{q}(r_{nkj} = c) = \exp & \left\{ -\frac{1}{2} \langle \log |\mathbf{I} + \mathbf{A}_{nk} \odot \mathbf{r}_{nk} \mathbf{r}_{nk}^T| \rangle \right. \\ & + \frac{1}{2} \text{tr} [(\mathbf{I} + \mathbf{A}_{nk} \odot \mathbf{r}_{nk} \mathbf{r}_{nk}^T)^{-1} (\mathbf{R}_{nk} \mathbf{t}_{nk}) (\mathbf{R}_{nk} \mathbf{t}_{nk})^T] \\ & \left. + c \langle \log \rho_{kj} \rangle + (1 - c) \langle \log(1 - \rho_{kj}) \rangle + \text{const.} \right\}, \quad (16) \end{aligned}$$

as shown in the paper.

(v)  $q(z_n)$ : For  $q(z_n)$ , we define the quantity

$$\begin{aligned} \bar{q}(z_n = k) = \exp & \left\{ \langle \log \mathcal{N}(\mathbf{x}_{nk} | \mathbf{0}, \mathbf{I}_{p_k}) \rangle + \sum_l \langle \phi_{nl} \rangle \langle \log p(y_{nl} | \mathbf{x}_{nk}, \mathbf{r}_{nk}, u_{nl}, \phi_{nl} = 1, z_n = k) \rangle \right. \\ & + \sum_l \langle 1 - \phi_{nl} \rangle \langle \log p(y_{nl} | \mathbf{x}_{nk}, \mathbf{r}_{nk}, u_{nl}, \phi_{nl} = 0, z_n = k) \rangle \\ & + \sum_l \langle \phi_{nl} \rangle \langle \log p(u_{nl} | \phi_{nl} = 1, z_n = k) - \log q(u_{nl} | \phi_{nl} = 1, z_n = k) \rangle \\ & \left. + \langle \log p(\mathbf{r}_{nk}) \rangle - \langle \log q(\mathbf{x}_{nk} | \mathbf{r}_{nk}) \rangle - \langle \log q(\mathbf{r}_{nk}) \rangle + \langle \log \pi_k \rangle \right\}. \quad (17) \end{aligned}$$

Then,  $q(z_n)$  that maximizes the evidence lower bound is given by

$$q(z_n = k) = \frac{\bar{q}(z_n = k)}{\sum_{k'} \bar{q}(z_n = k')}. \quad (18)$$

The expectations in equation (17) can be evaluated referring to Table A1. Mathematical manipulation gives the expression in the paper, where the expectations with respect to  $q(\mathbf{r}_{nk})$  have been replaced by the random imputations.

## 2. Deriving the auxiliary posteriors of the parameters

The auxiliary posterior  $q(\boldsymbol{\pi})$  that maximizes the evidence lower bound can be derived as

$$\begin{aligned} q(\boldsymbol{\pi}) &\propto \exp \left[ \sum_{n,k} \langle \delta_{z_n,k} \rangle \log \pi_k + \log \text{Dir}(\boldsymbol{\pi} | \boldsymbol{\alpha}_0) \right] \\ &\propto \exp \left[ \sum_k \left( \alpha_{0k} + \sum_n \langle \delta_{z_n,k} \rangle - 1 \right) \log \pi_k \right]. \end{aligned} \quad (19)$$

It follows that

$$q(\boldsymbol{\pi}) = \text{Dir}(\boldsymbol{\pi} | \hat{\boldsymbol{\alpha}}), \quad (20)$$

as shown in the paper.

The auxiliary posterior  $q(\beta_l)$  that maximizes the evidence lower bound is given by

$$\begin{aligned} q(\beta_l) &\propto \exp \left[ \sum_n \langle \phi_{nl} \rangle \log \beta_l + \sum_n \langle 1 - \phi_{nl} \rangle \log(1 - \beta_l) + \log \text{Beta}(\beta_l | \kappa_1, \kappa_2) \right] \\ &\propto \exp \left[ \left( \kappa_1 + \sum_n \langle \phi_{nl} \rangle - 1 \right) \log \beta_l + \left( \kappa_2 + \sum_n \langle 1 - \phi_{nl} \rangle - 1 \right) \log(1 - \beta_l) \right]. \end{aligned} \quad (21)$$

It follows that

$$q(\beta_l) = \text{Beta}(\beta_l | \hat{\kappa}_{1l}, \hat{\kappa}_{2l}), \quad (22)$$

as shown in the paper.

The auxiliary posterior  $q(\rho_{kj})$  that maximizes the evidence lower bound is given as

$$\begin{aligned} q(\rho_{kj}) &\propto \exp \left[ \sum_n \langle \delta_{z_n,k} \rangle \langle r_{nkj} \rangle \log \rho_{kj} + \sum_n \langle \delta_{z_n,k} \rangle \langle 1 - r_{nkj} \rangle \log(1 - \rho_{kj}) + \log \text{Beta}(\rho_{kj} | \tau_1, \tau_2) \right] \\ &\propto \exp \left[ \left( \tau_1 + \sum_n \langle \delta_{z_n,k} \rangle \langle r_{nkj} \rangle - 1 \right) \log \rho_{kj} + \left( \tau_2 + \sum_n \langle \delta_{z_n,k} \rangle \langle 1 - r_{nkj} \rangle - 1 \right) \log(1 - \rho_{kj}) \right]. \end{aligned} \quad (23)$$

It follows that

$$q(\rho_{kj}) = \text{Beta}(\rho_{kj} | \hat{\tau}_{1kj}, \hat{\tau}_{2kj}), \quad (24)$$

as in the paper.

The auxiliary posterior  $q(\mathbf{w}_{kl})$  that maximizes the evidence lower bound can be obtained as

$$\begin{aligned} q(\mathbf{w}_{kl}) &\propto \exp \left\{ \sum_n \langle \delta_{z_n,k} \rangle \left[ \langle \phi_{nl} \rangle \langle \log p(y_{nl} | \mathbf{x}_{nk}, \mathbf{r}_{nk}, u_{nl}, \phi_{nl} = 1, z_n = k) \rangle \right. \right. \\ &\quad \left. \left. + \langle 1 - \phi_{nl} \rangle \langle \log p(y_{nl} | \mathbf{x}_{nk}, \mathbf{r}_{nk}, u_{nl}, \phi_{nl} = 0, z_n = k) \rangle \right] + \log \mathcal{N}(\mathbf{w}_{kl} | \mathbf{0}, m_0 \mathbf{I}_{p_k}) \right\} \\ &\propto \exp \left\{ -\frac{1}{2} \sum_n \langle \delta_{z_n,k} \rangle \left[ \langle \phi_{nl} \rangle \langle \sigma_{kl} \rangle \langle u_{nl} \rangle_k^1 \langle (y_{nl} - \mathbf{w}_{kl}^T \mathbf{R}_{nk} \mathbf{x}_{nk} - \mu_{kl})^2 \rangle \right. \right. \\ &\quad \left. \left. + \langle 1 - \phi_{nl} \rangle \langle \sigma_{0l} \rangle \langle u_{nl} \rangle^0 \langle (y_{nl} - \mathbf{w}_{kl}^T \mathbf{R}_{nk} \mathbf{x}_{nk} - \mu_{0l})^2 \rangle \right] - \frac{m_0}{2} \mathbf{w}_{kl}^T \mathbf{w}_{kl} \right\}. \end{aligned} \quad (25)$$

Mathematical manipulation gives

$$q(\mathbf{w}_{kl}) = \mathcal{N}(\mathbf{w}_{kl} | \hat{\mathbf{m}}_{kl}, \hat{\mathbf{M}}_{kl}), \quad (26)$$

as presented in the paper.

The auxiliary posterior  $q(\mu_{kl})$  that maximizes the evidence lower bound can be obtained as

$$\begin{aligned} q(\mu_{kl}) &\propto \exp \left[ \sum_n \langle \delta_{z_n, k} \rangle \langle \phi_{nl} \rangle \langle \log p(y_{nl} | \mathbf{x}_{nk}, \mathbf{r}_{nk}, u_{nl}, \phi_{nl} = 1, z_n = k) \rangle + \log \mathcal{N}(\mu_{kl} | s_l, \lambda_0) \right] \\ &\propto \exp \left[ -\frac{1}{2} \langle \sigma_{kl} \rangle \sum_n \langle \delta_{z_n, k} \rangle \langle \phi_{nl} \rangle \langle u_{nl} \rangle_k^1 \langle (\tilde{y}_{nl}^k - \mu_{kl})^2 \rangle - \frac{\lambda_0}{2} (\mu_{kl} - s_l)^2 \right], \end{aligned} \quad (27)$$

which gives

$$q(\mu_{kl}) = \mathcal{N}(\mu_{kl} | \hat{s}_{kl}, \hat{\lambda}_{kl}), \quad (28)$$

as shown in the paper.

The auxiliary posterior  $q(\mu_{0l})$  that maximizes the evidence lower bound can be obtained as

$$\begin{aligned} q(\mu_{0l}) &\propto \exp \left[ \sum_{n,k} \langle \delta_{z_n, k} \rangle \langle 1 - \phi_{nl} \rangle \langle \log p(y_{nl} | \mathbf{x}_{nk}, \mathbf{r}_{nk}, u_{nl}, \phi_{nl} = 0, z_n = k) \rangle + \log \mathcal{N}(\mu_{0l} | s_l, \lambda_0) \right] \\ &\propto \exp \left[ -\frac{1}{2} \langle \sigma_{0l} \rangle \sum_{n,k} \langle \delta_{z_n, k} \rangle \langle 1 - \phi_{nl} \rangle \langle u_{nl} \rangle^0 \langle (\tilde{y}_{nl}^k - \mu_{0l})^2 \rangle - \frac{\lambda_0}{2} (\mu_{0l} - s_l)^2 \right], \end{aligned} \quad (29)$$

which gives

$$q(\mu_{0l}) = \mathcal{N}(\mu_{0l} | \hat{s}_{0l}, \hat{\lambda}_{0l}), \quad (30)$$

as shown in the paper.

The auxiliary posterior  $q(\sigma_{kl})$  that maximizes the evidence lower bound can be obtained as

$$\begin{aligned} q(\sigma_{kl}) &\propto \exp \left[ \sum_n \langle \delta_{z_n, k} \rangle \langle \phi_{nl} \rangle \langle \log p(y_{nl} | \mathbf{x}_{nk}, \mathbf{r}_{nk}, u_{nl}, \phi_{nl} = 1, z_n = k) \rangle + \log \mathcal{G}(\sigma_{kl} | \frac{\eta_0}{2}, \frac{\xi_0}{2}) \right] \\ &\propto \exp \left[ \frac{1}{2} \sum_n \langle \delta_{z_n, k} \rangle \langle \phi_{nl} \rangle \log \sigma_{kl} - \frac{1}{2} \sigma_{kl} \sum_n \langle \delta_{z_n, k} \rangle \langle \phi_{nl} \rangle \langle u_{nl} \rangle_k^1 \langle (\tilde{y}_{nl}^k - \mu_{kl})^2 \rangle + \left( \frac{\eta_0}{2} - 1 \right) \log \sigma_{kl} - \frac{\xi_0}{2} \sigma_{kl} \right], \end{aligned} \quad (31)$$

which gives

$$q(\sigma_{kl}) = \mathcal{G}\left(\sigma_{kl} | \frac{\hat{\eta}_{kl}}{2}, \frac{\hat{\xi}_{kl}}{2}\right), \quad (32)$$

as shown in the paper.

The auxiliary posterior  $q(\sigma_{0l})$  that maximizes the evidence lower bound can be obtained as

$$\begin{aligned} q(\sigma_{0l}) &\propto \exp \left[ \sum_{n,k} \langle \delta_{z_n, k} \rangle \langle 1 - \phi_{nl} \rangle \langle \log p(y_{nl} | \mathbf{x}_{nk}, \mathbf{r}_{nk}, u_{nl}, \phi_{nl} = 0, z_n = k) \rangle + \log \mathcal{G}(\sigma_{0l} | \frac{\eta_0}{2}, \frac{\xi_0}{2}) \right] \\ &\propto \exp \left[ \frac{1}{2} \sum_n \langle 1 - \phi_{nl} \rangle \log \sigma_{0l} - \frac{1}{2} \sigma_{0l} \sum_{n,k} \langle \delta_{z_n, k} \rangle \langle 1 - \phi_{nl} \rangle \langle u_{nl} \rangle^0 \langle (\tilde{y}_{nl}^k - \mu_{0l})^2 \rangle + \left( \frac{\eta_0}{2} - 1 \right) \log \sigma_{0l} - \frac{\xi_0}{2} \sigma_{0l} \right], \end{aligned} \quad (33)$$

which gives

$$q(\sigma_{0l}) = \mathcal{G}\left(\sigma_{0l} | \frac{\hat{\eta}_{0l}}{2}, \frac{\hat{\xi}_{0l}}{2}\right), \quad (34)$$

as in the paper.

To obtain  $v_{kl}$  that maximizes the evidence lower bound, we solve the equation

$$\frac{\partial}{\partial v_{kl}} \left\{ \sum_n \langle \delta_{zn,k} \rangle \langle \phi_{nl} \rangle \left[ \left( \frac{v_{kl}}{2} - 1 \right) \langle \log u_{nl} \rangle_k^1 - \frac{v_{kl}}{2} \langle u_{nl} \rangle_k^1 + \frac{v_{kl}}{2} \log \frac{v_{kl}}{2} - \log \Gamma \left( \frac{v_{kl}}{2} \right) \right] \right\} = 0, \quad (35)$$

which gives the equation in the paper.

To obtain  $v_{0l}$  we solve the equation

$$\frac{\partial}{\partial v_{0l}} \left\{ \sum_n \langle 1 - \phi_{nl} \rangle \left[ \left( \frac{v_{0l}}{2} - 1 \right) \langle \log u_{nl} \rangle^0 - \frac{v_{0l}}{2} \langle u_{nl} \rangle^0 + \frac{v_{0l}}{2} \log \frac{v_{0l}}{2} - \log \Gamma \left( \frac{v_{0l}}{2} \right) \right] \right\} = 0, \quad (36)$$

as given in the paper.

**Author Contributions:** Conceptualization, Y.N. and W.X.; methodology, S.F.; software, S.F.; validation, S.F.; formal analysis, S.F.; writing—original draft preparation, S.F.; writing—review and editing, W.X.; visualization, S.F.; supervision, Y.N.; funding acquisition, Y.N. All authors have read and agreed to the published version of the manuscript.

**Funding:** This research was funded by the National Key R&D Program of China grant number 2020YFA0713603 and the National Natural Science Foundation of China grant number 11971386.

**Conflicts of Interest:** The authors declare no conflicts of interest.

## References

1. Sun, J.; Zhou, A.; Keates, S.; Liao, S. Simultaneous Bayesian clustering and feature selection through student's  $t$  mixtures model. *IEEE Trans. Neural Netw. Learn. Syst.* **2018**, *29*, 1187–1199.

**Disclaimer/Publisher's Note:** The statements, opinions and data contained in all publications are solely those of the individual author(s) and contributor(s) and not of MDPI and/or the editor(s). MDPI and/or the editor(s) disclaim responsibility for any injury to people or property resulting from any ideas, methods, instructions or products referred to in the content.
